# Supplementary material for: Rapid dark aging of biomass burning as an overlooked source of oxidized organic aerosol
Source: PubMed Central journal article supplement (PMC7776776; doi:10.1073/pnas.2010365117), 2020-12-14
Supplement: pnas.2010365117.sapp.pdf [file pnas.2010365117.sapp.pdf]

## SUPPLEMENTAL INFORMATION

### **Rapid dark aging of biomass burning as an overlooked source of oxidized organic aerosol**

John K. Kodros<sup>1</sup>, Dimitrios K. Papanastasiou<sup>1,\*</sup>, Marco Paglione<sup>1,2</sup>, Mauro Masiol<sup>1</sup>, Stefania Squizzato<sup>1</sup>, Kalliopi Florou<sup>1</sup>, Ksakousti Skyllakou<sup>1</sup>, Christos Kaltsonoudis<sup>1</sup>, Athanasios Nenes<sup>1,3</sup>, Spyros N. Pandis<sup>1,4</sup>

<sup>1</sup>Institute of Chemical Engineering Sciences, ICE-HT, Patras, Greece

<sup>2</sup>Italian National Research Council - Institute of Atmospheric Sciences and Climate (CNR-ISAC), Bologna, Italy

<sup>3</sup>ENAC/IIE Swiss Federal Institute of Technology Lausanne (EPFL), Lausanne, Switzerland

<sup>4</sup>Department of Chemical Engineering, University of Patras, Patras, Greece

\*now at: Buffalo Research Laboratories, Honeywell International Inc., 20 Peabody St., Buffalo NY 14210 USA

**Table S1.** Experimental description and procedure. Concentrations of O<sub>3</sub> and NO<sub>2</sub> correspond to initial observed values after the O<sub>3</sub> injection (hour 0). Relative humidity corresponds to the value after the biomass burning injection. O:C,  $f_{44}/f_{60}$ , OA, and nitrate (aerosol) are expressed as relative enhancement factors (see Methods). Experiments in bold are used as representative experiments in the main and supplemental text.

| <b>Experiment</b> | <b>O<sub>3</sub></b><br>[ppb] | <b>NO<sub>2</sub></b><br>[ppb] | <b>Dark/<br/>Lights</b> | <b>RH</b> | <b>O:C</b> | <b><math>f_{44}/f_{60}</math></b> | <b>OA</b> | <b>Nitrate</b> |
|-------------------|-------------------------------|--------------------------------|-------------------------|-----------|------------|-----------------------------------|-----------|----------------|
| <b>Exp. 1</b>     | -                             | -                              | Dark                    | 10%       | 1.01       | 1.10                              | 0.93      | 1.22           |
| <b>Exp. 2</b>     | -                             | -                              | Lights                  | 10%       | 1.82       | 4.85                              | 1.16      | 0.85           |
| <b>Exp. 3</b>     | 81                            | 88                             | Dark                    | 10%       | 1.30       | 2.03                              | 1.51      | 4.04           |
| Exp. 4            | 37                            | 35                             | Dark                    | 10%       | 1.20       | 1.57                              | 1.32      | 3.63           |
| Exp. 5            | 88                            | 43                             | Dark                    | 10%       | 1.36       | 2.53                              | 1.77      | 5.62           |
| Exp. 6            | 44                            | 88                             | Dark                    | 10%       | 1.25       | 2.30                              | 1.70      | 2.57           |
| Exp. 7            | 90                            | 95                             | Dark                    | 50%       | 1.46       | 4.85                              | 1.64      | 4.00           |
| <b>Exp. 8</b>     | 90                            | 84                             | Dark                    | 75%       | 1.40       | 4.15                              | 1.15      | 1.96           |
| Exp. 9            | 83                            | 92                             | Dark                    | 70%       | 1.48       | 6.05                              | 1.33      | 2.81           |
| Exp. 10           | 43                            | -                              | Dark                    | 10%       | 1.19       | 1.66                              | 1.22      | 1.83           |

**Table S2.** Comparisons (quantified by the theta angle) to ambient AMS OA factors from previous studies to the produced bbOOA in the dark-dry and dark-RH laboratory experiments from this study.

| Reference                | Location            | Factor          | Dark-Dry<br>Produced OOA<br>[degrees] | Dark-RH<br>Produced OOA<br>[degrees] |
|--------------------------|---------------------|-----------------|---------------------------------------|--------------------------------------|
| Florou et al.<br>(1)     | Patras,<br>Greece   | OOA [HR]        | 13                                    | 11                                   |
| Florou et al.<br>(1)     | Athens,<br>Greece   | OOA [HR]        | 17                                    | 19                                   |
| Gilardoni et<br>al. (2)  | Bologna,<br>Italy   | OOA [HR]        | 15                                    | 20                                   |
| Crippa et al.<br>(3)     | Paris, France       | LV-OOA<br>[UMR] | 14                                    | 9                                    |
| Crippa et al.<br>(3)     | Paris, France       | OOA2 [UMR]      | 20                                    | 28                                   |
| Saarikoski et<br>al. (4) | Po Valley,<br>Italy | OOAa [UMR]      | 16                                    | 10                                   |
| Saarikoski et<br>al. (4) | Po Valley,<br>Italy | OOAb [UMR]      | 8                                     | 9                                    |
| Ge et al. (5)            | Fresno, USA         | OOA [UMR]       | 17                                    | 26                                   |
| Mohr et al.<br>(6)       | Barcelona,<br>Spain | LVOOA<br>[HR]   | 14                                    | 9                                    |
| Chen et al.<br>(7)       | Fresno, USA         | NOOA [HR]       | 31                                    | 32                                   |

**Table S3:** Comparisons (quantified by the theta angle) to ambient AMS OA factors from previous studies to the produced bbOA in the dark-dry and dark-RH laboratory experiments from this study.

| Reference                | Location            | Factor     | Dark-Dry<br>bbOA | Dark-RH<br>bbOA |
|--------------------------|---------------------|------------|------------------|-----------------|
| Florou et al.<br>(1)     | Patras, Greece      | BBOA [HR]  | 20               | 19              |
| Florou et al.<br>(1)     | Athens, Greece      | BBOA [HR]  | 19               | 23              |
| Gilardoni et<br>al. (2)  | Bologna, Italy      | BBOA [HR]  | 27               | 32              |
| Crippa et al.<br>(3)     | Paris, France       | BBOA [UMR] | 23               | 29              |
| Saarikoski et<br>al. (4) | Po Valley, Italy    | BBOA [UMR] | 30               | 33              |
| Ge et al. (5)            | Fresno, USA         | BBOA [UMR] | 16               | 13              |
| Mohr et al.<br>(6)       | Barcelona,<br>Spain | BBOA [HR]  | 36               | 36              |
| Chen et al.<br>(7)       | Fresno, USA         | BBOA [HR]  | 27               | 27              |

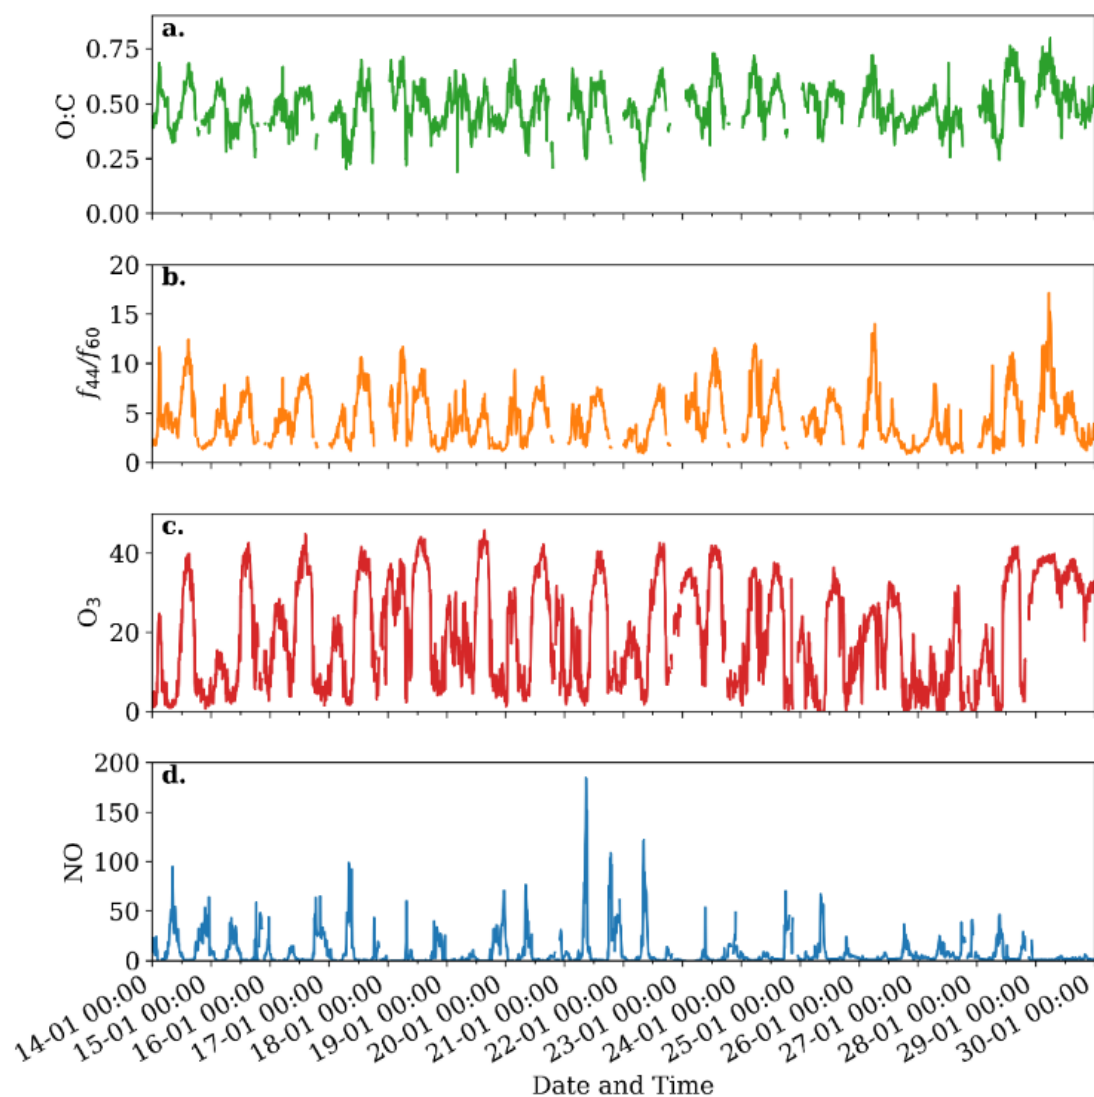

**Figure S1.** Time series from 16-days of ambient observations taken in Patras, Greece between January 14-30 2020 of (a) O:C and (b)  $f_{44}/f_{60}$  measured with the HR-ToF-AMS as well as (c)  $O_3$  and (d) NO.

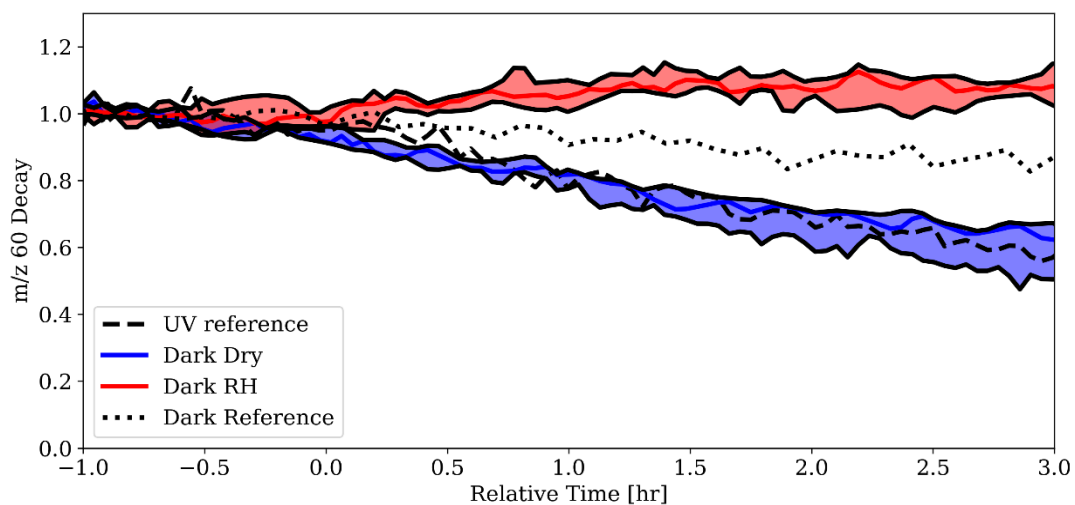

**Figure S2.** The decay of AMS-measured OA signal at  $m/z$  60 (normalized to  $\text{SO}_4$  to account for particle wall loss and collection efficiency corrections). The OA signal at  $m/z$  60 (representative of levoglucosan and other sugars) decays in the dark-aging experiments (Exp. 7-9) under high RH conditions a similar amount as under UV conditions (Exp. 2); however, under dark dry conditions (Exp. 3-6), the signal at  $m/z$  60 increases by approximately 10%.

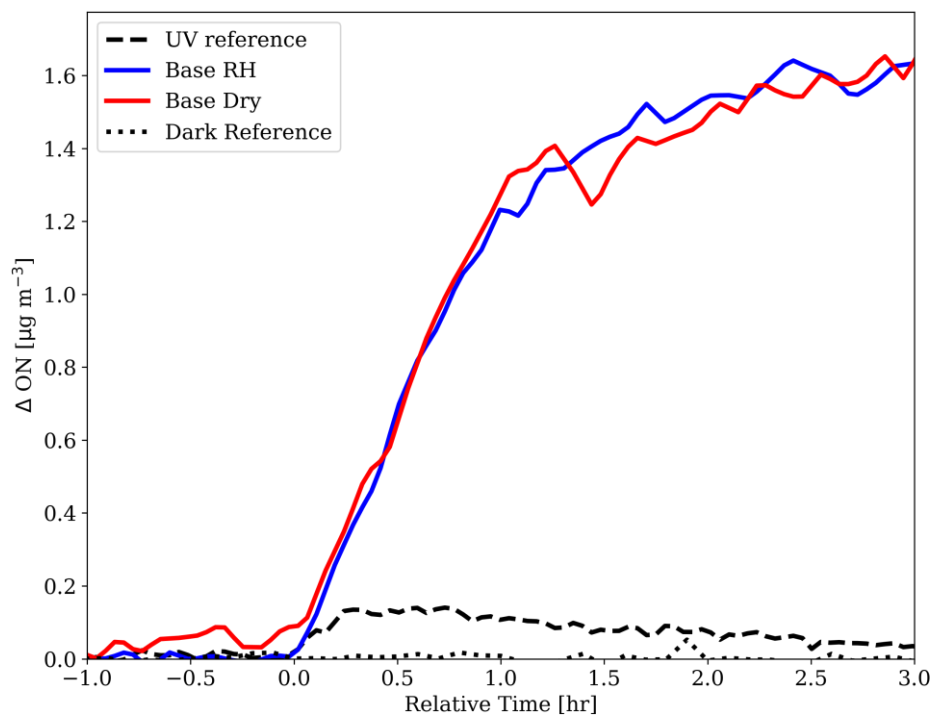

**Figure S3.** The change in organic nitrate mass concentration from the conditions prior to the initiation of oxidation for representative experiments under UV light conditions (*UV reference*, Exp. 2), dark and dry conditions (Exp. 3), dark and high RH conditions (Exp. 8), and dark with no oxidants (*dark reference*, Exp. 1).

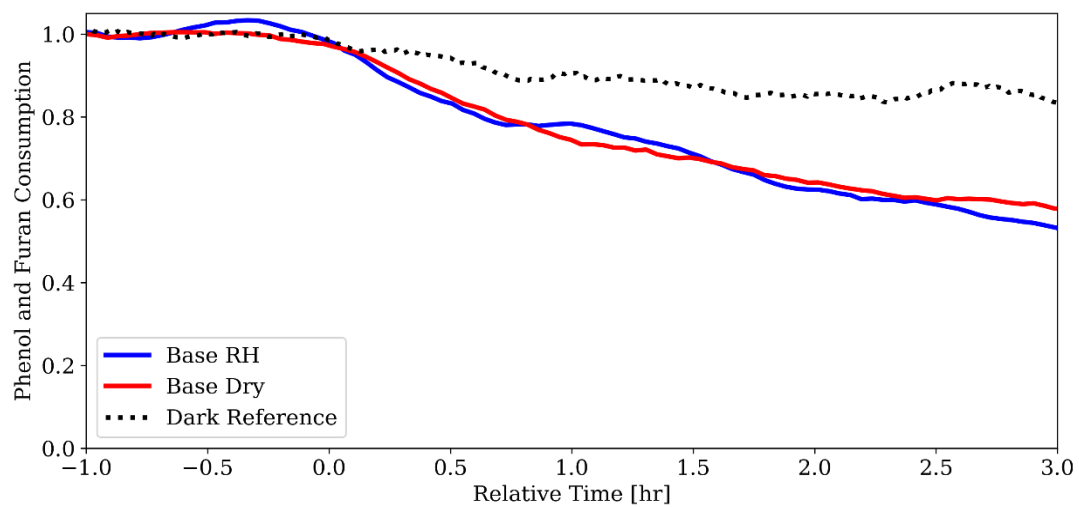

**Figure S4.** The decay of the summed phenolic and furanoic compounds relative to initial conditions prior to the initiation of oxidation measured from the PTR-MS in representative dark aging experiments under dry (Exp. 3) and high RH conditions (Exp. 8) as well as the *dark reference* experiment with no added oxidations (Exp. 1).



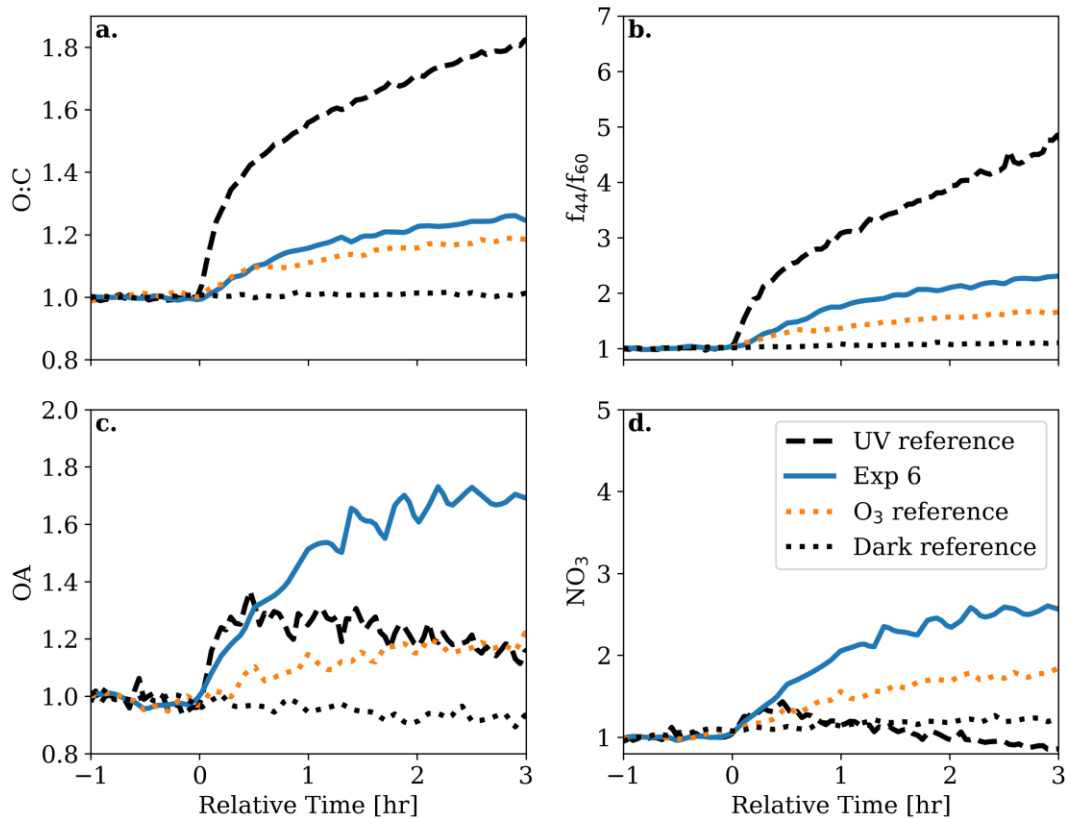

**Figure S5.** The enhancement in (a) O:C ratio, (b)  $f_{44}/f_{60}$ , (c) OA, (d) NO<sub>3</sub> aerosol (as in Figure 2 in the main text) for a dark aging experiment with only an injection of O<sub>3</sub> (Exp. 10) and an experiment with a similar injection of O<sub>3</sub> as well as NO<sub>2</sub> (Exp. 6). We note, however, that the BB combustion itself emitted 12 ppb of NO<sub>x</sub> (NO+NO<sub>2</sub>) in the O<sub>3</sub> reference (Exp. 10) experiment, and so this cannot be considered only containing O<sub>3</sub>.

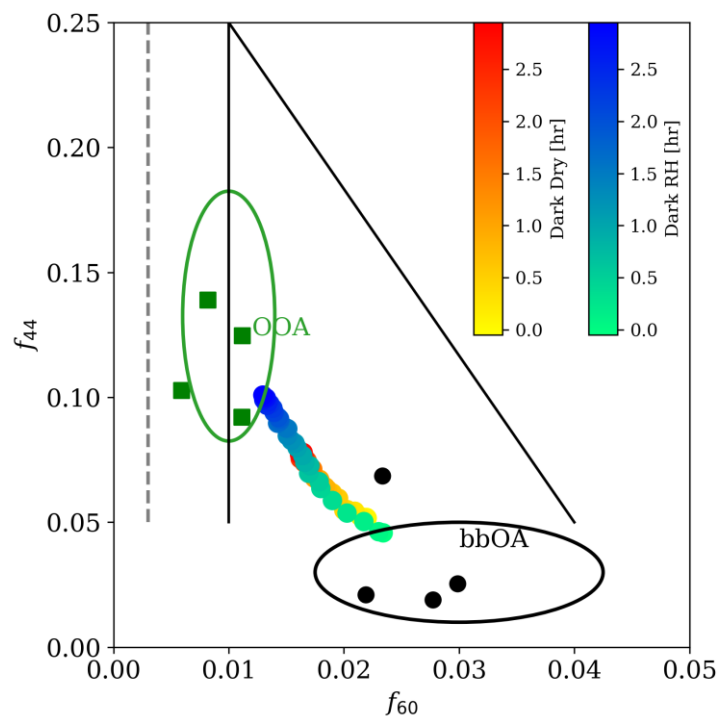

**Figure S6.** Evolution of HR-ToF-AMS measured OA through  $f_{60}$  versus  $f_{44}$  space for a representative dark aging experiment under dry (Exp. 3) and high RH (Exp. 8) conditions along with ambient bbOA (black circles) and OOA (green squares) factors.

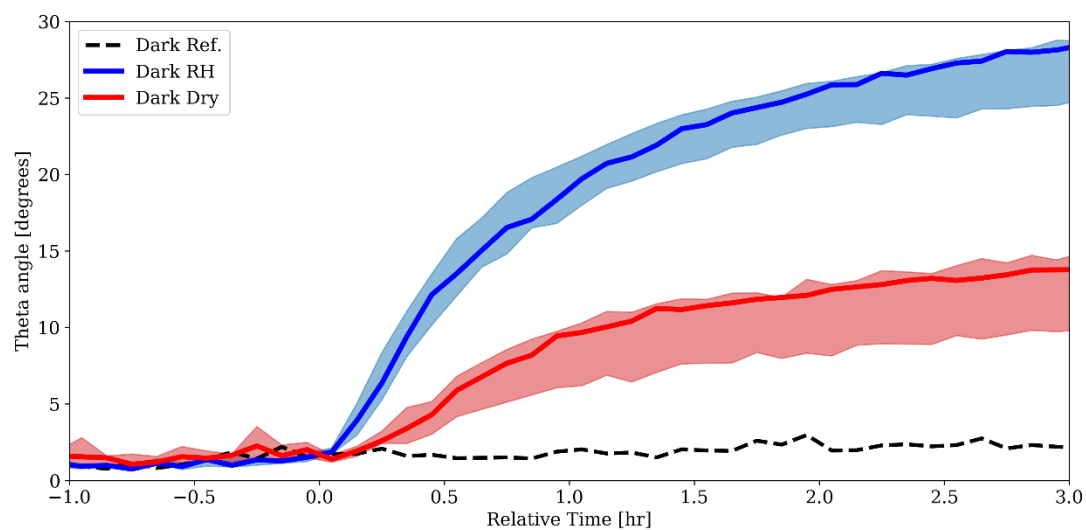

**Figure S7.** The evolution of the theta angle between the OA spectrum during the experiment relative to the average spectrum prior to the initiation of oxidation.

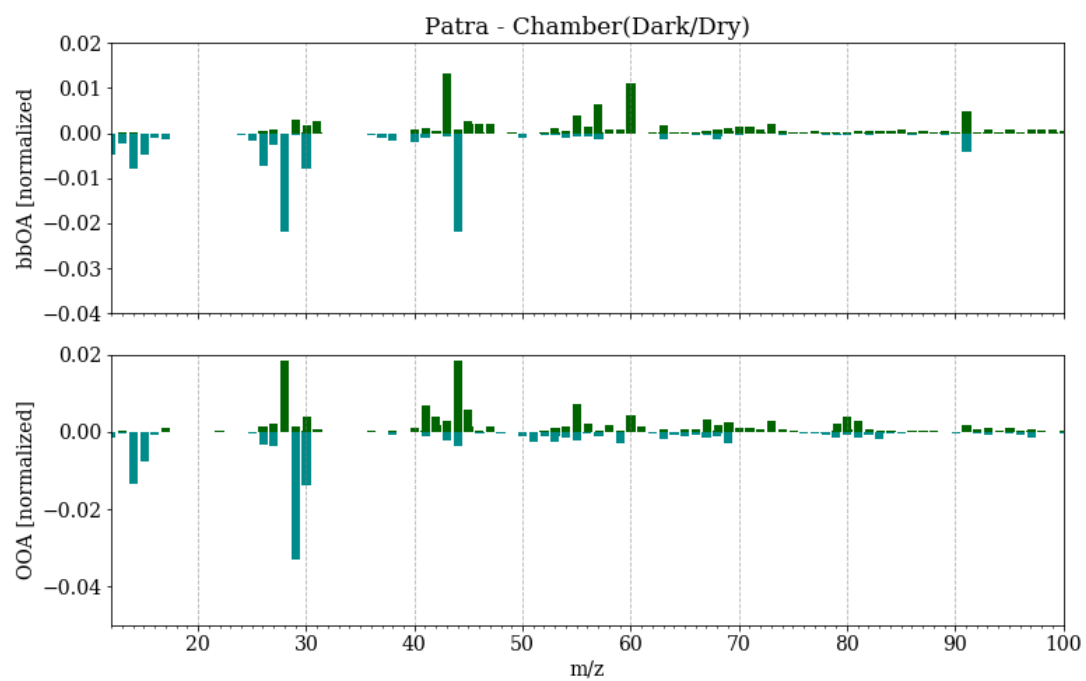

**Figure S8.** Difference in normalized spectra between the dark-dry chamber experiment and the ambient observations of bbOA and OOA factors in Patras, Greece.

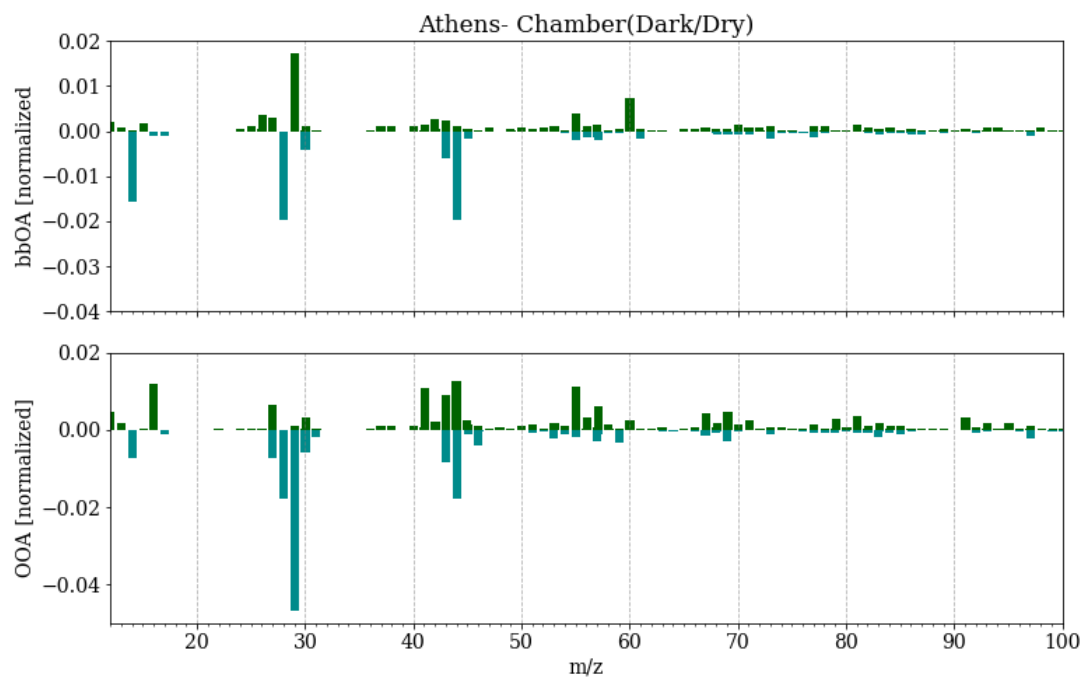

**Figure S9.** Difference in normalized spectra between the dark-dry chamber experiment and the ambient observations of bbOA and OOA factors in Athens, Greece.

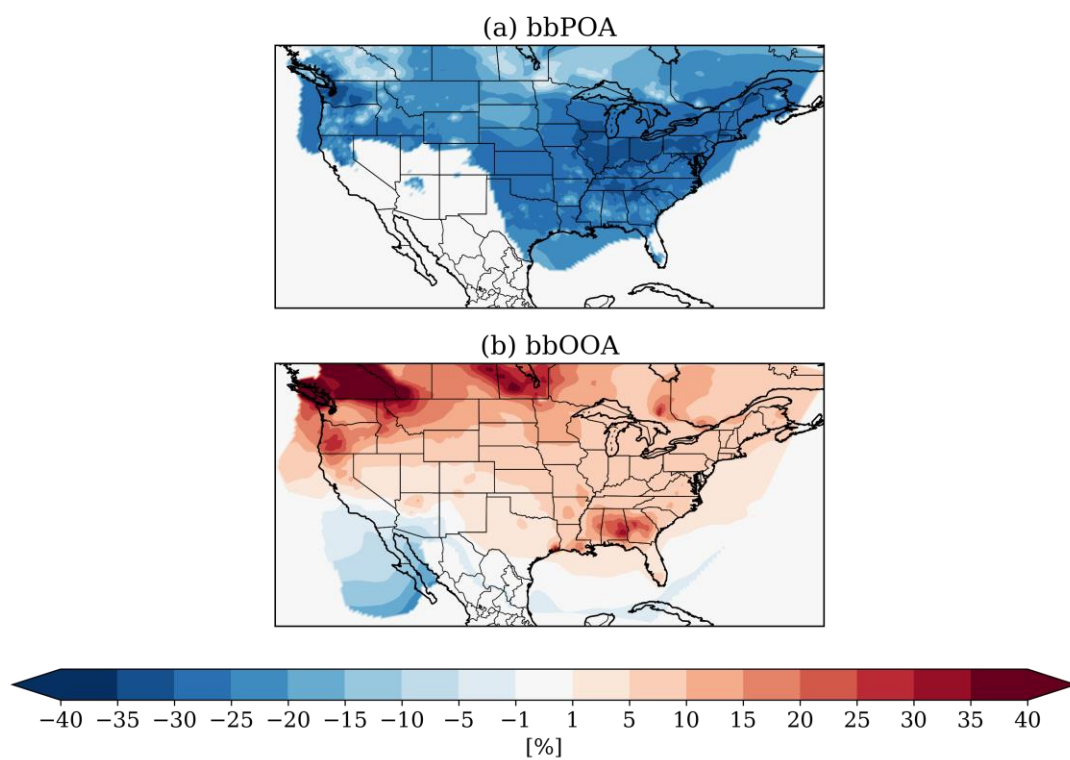

**Figure S10.** The percent difference in simulated (a) bbPOA and (b) bbOOA between model simulations with  $\text{NO}_3$  oxidation of BB-VOCs relative to simulations with only OH radical oxidation.

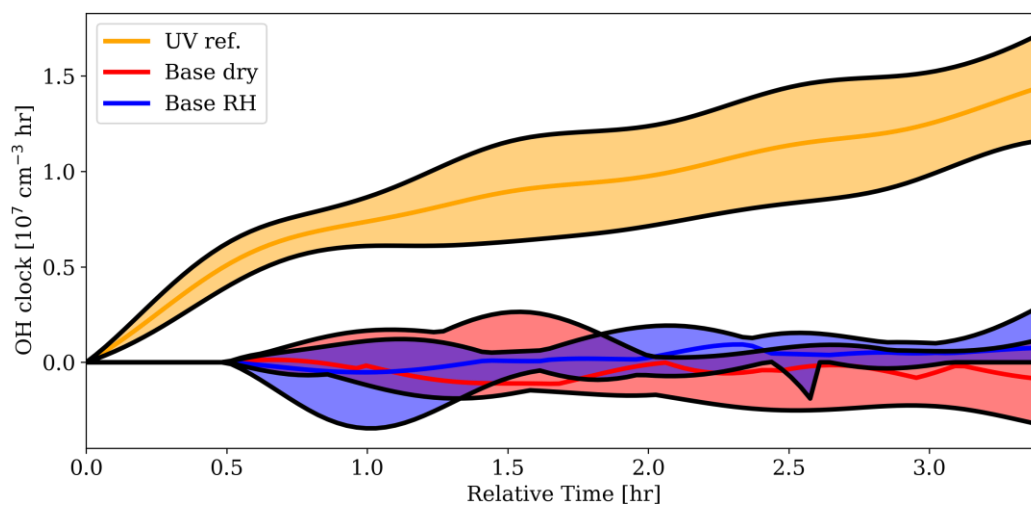

**Figure S11.** Integrated OH exposure during the experiments with and without lights.

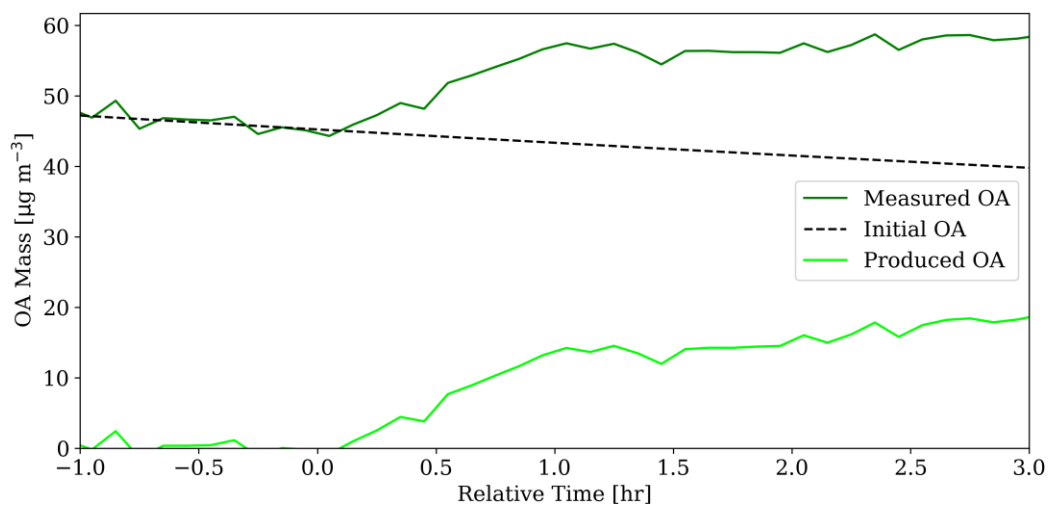

**Figure S12.** Time series of measured chamber OA from the representative dark aging experiment under dry conditions (Exp. 3) split into an initial (i.e. fresh) and produced (i.e. aged) OA factor using the mass-balance approach of Jorga et al. (2019).



## References

1. K. Florou, *et al.*, The contribution of wood burning and other pollution sources to wintertime organic aerosol levels in two Greek cities. *Atmos. Chem. Phys.* **17**, 3145–3163 (2017).
2. S. Gilardoni, *et al.*, Direct observation of aqueous secondary organic aerosol from biomass-burning emissions. *Proc. Natl. Acad. Sci.* **113**, 10013 LP – 10018 (2016).
3. M. Crippa, *et al.*, Wintertime aerosol chemical composition and source apportionment of the organic fraction in the metropolitan area of Paris. *Atmos. Chem. Phys.* **13**, 961–981 (2013).
4. S. Saarikoski, *et al.*, Chemical characterization of springtime submicrometer aerosol in Po Valley, Italy. *Atmos. Chem. Phys.* **12**, 8401–8421 (2012).
5. X. Ge, A. Setyan, Y. Sun, Q. Zhang, Primary and secondary organic aerosols in Fresno, California during wintertime: Results from high resolution aerosol mass spectrometry. *J. Geophys. Res. Atmos.* **117** (2012).
6. C. Mohr, *et al.*, Identification and quantification of organic aerosol from cooking and other sources in Barcelona using aerosol mass spectrometer data. *Atmos. Chem. Phys.* **12**, 1649–1665 (2012).
7. C.-L. Chen, *et al.*, Organic Aerosol Particle Chemical Properties Associated With Residential Burning and Fog in Wintertime San Joaquin Valley (Fresno) and With Vehicle and Firework Emissions in Summertime South Coast Air Basin (Fontana). *J. Geophys. Res. Atmos.* **123**, 10,707–710,731 (2018).
